# Supplementary material for: Long-Term Biogas Production from Glycolate by Diverse and Highly Dynamic Communities
Source: MDPI journal article supplement (doi:10.3390/microorganisms6040103), 2018-10-04
Supplement: s1 [file s1]

**Figure S1.** Reactor design

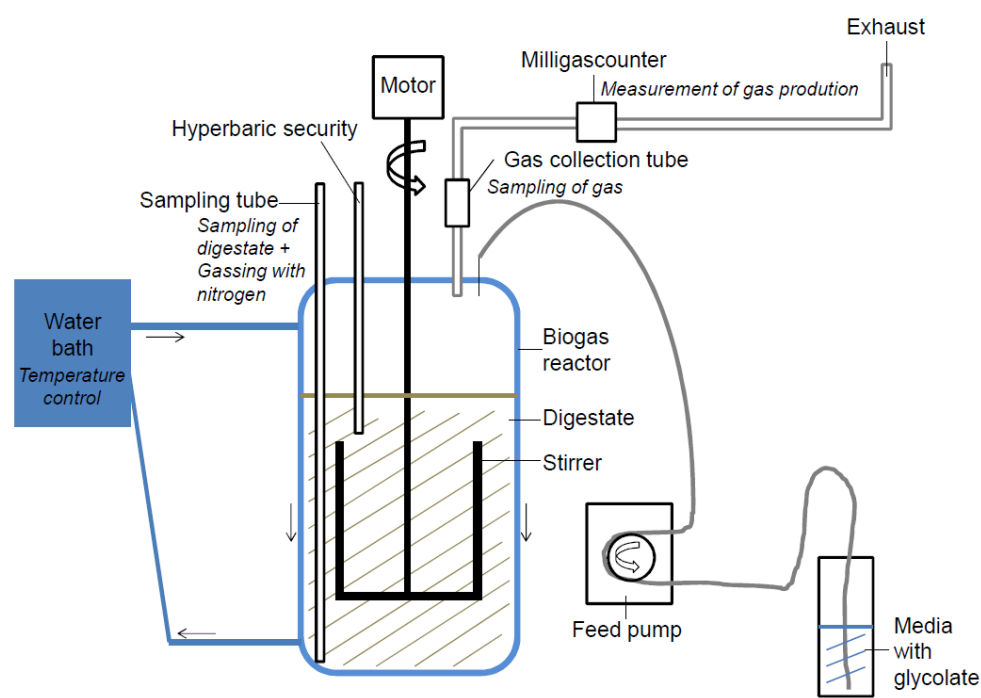

**Figure S1.** Design of the glycolate-fed biogas reactor (5 L) with a working volume of 3.5 L.
