# Supplementary material for: Long-Term Biogas Production from Glycolate by Diverse and Highly Dynamic Communities
Source: MDPI journal article supplement (doi:10.3390/microorganisms6040103), 2018-10-04
Supplement: s1 [file s1]

**Table S6.** Euclidian distances of dominant gates shown in Figure 3.

|     | G1    | G2    | G3    | G4    | G5    | G6    | G8    | G9    | G10   | G15   | G16   | G17   | G20   | G21   | G22   | G25   | G26   |
|-----|-------|-------|-------|-------|-------|-------|-------|-------|-------|-------|-------|-------|-------|-------|-------|-------|-------|
| G2  | 8.58  |       |       |       |       |       |       |       |       |       |       |       |       |       |       |       |       |
| G3  | 10.56 | 3.85  |       |       |       |       |       |       |       |       |       |       |       |       |       |       |       |
| G4  | 16.18 | 21.90 | 22.42 |       |       |       |       |       |       |       |       |       |       |       |       |       |       |
| G5  | 19.97 | 24.01 | 24.02 | 13.07 |       |       |       |       |       |       |       |       |       |       |       |       |       |
| G6  | 12.89 | 5.42  | 4.20  | 25.23 | 26.44 |       |       |       |       |       |       |       |       |       |       |       |       |
| G8  | 13.07 | 18.82 | 19.57 | 10.65 | 15.45 | 22.10 |       |       |       |       |       |       |       |       |       |       |       |
| G9  | 12.23 | 14.11 | 13.40 | 14.04 | 14.28 | 16.10 | 13.71 |       |       |       |       |       |       |       |       |       |       |
| G10 | 14.34 | 7.20  | 5.24  | 26.10 | 27.12 | 3.01  | 23.22 | 16.38 |       |       |       |       |       |       |       |       |       |
| G15 | 12.99 | 18.57 | 19.25 | 5.46  | 13.06 | 22.02 | 9.47  | 11.79 | 23.09 |       |       |       |       |       |       |       |       |
| G16 | 17.12 | 20.83 | 20.62 | 12.45 | 9.85  | 23.31 | 13.79 | 9.64  | 23.90 | 11.54 |       |       |       |       |       |       |       |
| G17 | 18.38 | 22.75 | 22.71 | 12.07 | 12.10 | 25.27 | 14.19 | 12.80 | 26.02 | 12.35 | 6.27  |       |       |       |       |       |       |
| G20 | 16.45 | 19.66 | 19.39 | 13.63 | 10.84 | 22.14 | 14.22 | 9.69  | 22.83 | 12.11 | 3.40  | 7.21  |       |       |       |       |       |
| G21 | 9.97  | 10.92 | 12.85 | 21.05 | 24.39 | 13.19 | 18.27 | 17.78 | 14.96 | 18.10 | 21.71 | 22.35 | 20.94 |       |       |       |       |
| G22 | 12.94 | 18.09 | 18.62 | 10.07 | 14.65 | 21.11 | 8.24  | 11.86 | 22.29 | 6.45  | 11.88 | 12.60 | 12.23 | 17.78 |       |       |       |
| G25 | 12.25 | 17.85 | 18.62 | 8.97  | 15.11 | 21.09 | 8.48  | 12.31 | 22.28 | 5.30  | 12.61 | 12.98 | 13.12 | 16.66 | 4.28  |       |       |
| G26 | 7.56  | 7.24  | 8.13  | 19.27 | 21.59 | 10.05 | 15.56 | 12.80 | 11.31 | 15.74 | 18.51 | 20.27 | 17.47 | 9.42  | 14.96 | 14.59 |       |
| G27 | 14.42 | 20.10 | 20.89 | 13.27 | 17.17 | 22.99 | 8.07  | 15.39 | 24.34 | 10.90 | 14.29 | 14.24 | 14.56 | 18.21 | 6.46  | 7.98  | 16.77 |
