# Supplementary material for: Long-Term Biogas Production from Glycolate by Diverse and Highly Dynamic Communities
Source: MDPI journal article supplement (doi:10.3390/microorganisms6040103), 2018-10-04
Supplement: s1 [file s1]

**Table S2.** Media and buffer composition. Media composition of the feed solution (pH was adjusted to 7.2 with NaOH) and composition of the phosphate-buffered saline (PBS, pH adjusted to 7.2 with either NaH<sub>2</sub>PO<sub>4</sub> or Na<sub>2</sub>HPO<sub>4</sub>).

| Component                                          | Concentration           |
|----------------------------------------------------|-------------------------|
| Salts                                              |                         |
| KH <sub>2</sub> PO <sub>4</sub>                    | 0.2 g L <sup>-1</sup>   |
| NH <sub>4</sub> Cl                                 | 0.25 g L <sup>-1</sup>  |
| NaCl                                               | 1 g L <sup>-1</sup>     |
| MgCl <sub>2</sub> ·6H <sub>2</sub> O               | 0.4 g L <sup>-1</sup>   |
| KCl                                                | 0.5 g L <sup>-1</sup>   |
| CaCl <sub>2</sub> 2H <sub>2</sub> O                | 0.15 g L <sup>-1</sup>  |
| Cysteine-HCl                                       | 0.27 g L <sup>-1</sup>  |
| Trace elements                                     |                         |
| FeCl <sub>2</sub> ·4H <sub>2</sub> O               | 3 µg L <sup>-1</sup>    |
| ZnCl <sub>2</sub>                                  | 140 µg L <sup>-1</sup>  |
| MnCl <sub>2</sub> 4H <sub>2</sub> O                | 0.2 mg L <sup>-1</sup>  |
| H <sub>3</sub> BO <sub>3</sub>                     | 12 µg L <sup>-1</sup>   |
| CoCl <sub>2</sub> 6H <sub>2</sub> O                | 0.38 mg L <sup>-1</sup> |
| CuCl <sub>2</sub> ·2H <sub>2</sub> O               | 4 µg L <sup>-1</sup>    |
| NiCl <sub>2</sub> 6H <sub>2</sub> O                | 48 µg L <sup>-1</sup>   |
| Na <sub>2</sub> MoO <sub>4</sub> 2H <sub>2</sub> O | 72 µg L <sup>-1</sup>   |
| Vitamins                                           |                         |
| Vitamin B12                                        | 50 µg L <sup>-1</sup>   |
| p-Aminobenzoic acid                                | 40 µg L <sup>-1</sup>   |
| D(+)-Biotin                                        | 10 µg L <sup>-1</sup>   |
| Nicotinic acid                                     | 100 µg L <sup>-1</sup>  |
| Calcium pantothenate                               | 50 µg L <sup>-1</sup>   |
| Pyridoxine hydrochloride                           | 150 µg L <sup>-1</sup>  |
| Thiamine-HCl 2H <sub>2</sub> O                     | 100 µg L <sup>-1</sup>  |
| Folic acid                                         | 15 µg L <sup>-1</sup>   |
| Lipoic acid                                        | 5 µg L <sup>-1</sup>    |
|                                                    |                         |
| Component                                          | Concentration           |
| NaH <sub>2</sub> PO <sub>4</sub>                   | 0.22 g L <sup>-1</sup>  |
| Na <sub>2</sub> HPO <sub>4</sub>                   | 0.85 g L <sup>-1</sup>  |
| NaCl                                               | 8.77 g L <sup>-1</sup>  |
