# Supplementary material for: Long-Term Biogas Production from Glycolate by Diverse and Highly Dynamic Communities
Source: MDPI journal article supplement (doi:10.3390/microorganisms6040103), 2018-10-04
Supplement: s1 [file s1]

**Table S4.** Sorted sampling days and gates

| Day | Gates | Relative abundance on sampled day [%] |
|-----|-------|---------------------------------------|
| 495 | G1    | 27.3                                  |
|     | G2    | 27                                    |
|     | G26   | 4.2                                   |
|     |       |                                       |
| 508 | G25   | 2.4                                   |
|     | G3    | 5.4                                   |
|     | G8    | 2.9                                   |
|     | G6    | 1.8                                   |
