# Supplementary material for: Long-Term Biogas Production from Glycolate by Diverse and Highly Dynamic Communities
Source: MDPI journal article supplement (doi:10.3390/microorganisms6040103), 2018-10-04
Supplement: s1 [file s1]

**Table S10.** Significant correlation values. Correlation values (Spearman's rho) corresponding to the correlation maps in Figure 5 with only the significant (*P*-value after Benjamini-Hochberg correction <0.05) correlations shown for each parameter and time point. A moving window approach was used for the analysis with 20 time points as the window size. Phases (P1: day 1-180, P2: day 183-232, P3: day 234-281, P4: day 284-414, P5: day 416-470, P6: day 472-526) can be differentiated by the alternating grey/white background coloring.

| Time range | Biogas amount |    |    |      |     |      |      | Biogas productivity |    |    |      |     |      |      | Acetate |    |    |    |     |       |     | Propionate |      |      |    |     |       |       | Glyoxylate |       |       |    |      |      |       |
|------------|---------------|----|----|------|-----|------|------|---------------------|----|----|------|-----|------|------|---------|----|----|----|-----|-------|-----|------------|------|------|----|-----|-------|-------|------------|-------|-------|----|------|------|-------|
|            | G3            | G6 | G2 | G1   | G26 | G8   | G25  | G3                  | G6 | G2 | G1   | G26 | G8   | G25  | G3      | G6 | G2 | G1 | G26 | G8    | G25 | G3         | G6   | G2   | G1 | G26 | G8    | G25   | G3         | G6    | G2    | G1 | G26  | G8   | G25   |
| 1 - 74     |               |    |    |      |     |      |      |                     |    |    |      |     |      |      |         |    |    |    |     | -0.64 |     |            |      |      |    |     | -0.60 |       |            |       |       |    | 0.45 | 0.50 |       |
| 2 - 79     |               |    |    |      |     |      |      |                     |    |    |      |     |      |      |         |    |    |    |     | -0.60 |     |            |      |      |    |     | -0.60 |       |            |       |       |    |      |      |       |
| 3 - 80     |               |    |    |      |     |      |      |                     |    |    |      |     |      |      |         |    |    |    |     | -0.54 |     |            |      |      |    |     | -0.54 |       |            |       |       |    |      |      |       |
| 4 - 81     |               |    |    |      |     |      |      |                     |    |    |      |     |      |      |         |    |    |    |     |       |     |            |      |      |    |     | -0.46 |       |            |       |       |    |      |      |       |
| 5 - 82     |               |    |    |      |     |      |      |                     |    |    |      |     |      |      |         |    |    |    |     |       |     |            |      |      |    |     |       |       |            |       |       |    |      |      |       |
| 29 - 87    |               |    |    | 0.48 |     |      |      |                     |    |    | 0.48 |     |      |      |         |    |    |    |     |       |     |            |      |      |    |     |       |       |            |       |       |    |      |      |       |
| 30 - 89    |               |    |    |      |     | 0.49 |      |                     |    |    |      |     | 0.49 |      |         |    |    |    |     |       |     |            |      |      |    |     |       |       |            |       |       |    |      |      |       |
| 31 - 92    |               |    |    | 0.49 |     | 0.60 |      |                     |    |    | 0.49 |     | 0.60 |      |         |    |    |    |     |       |     |            |      |      |    |     |       |       |            |       |       |    |      |      |       |
| 32 - 93    |               |    |    | 0.53 |     | 0.60 |      |                     |    |    | 0.53 |     | 0.60 |      |         |    |    |    |     |       |     |            |      |      |    |     |       |       |            |       |       |    |      |      |       |
| 33 - 94    |               |    |    | 0.51 |     | 0.58 |      |                     |    |    | 0.51 |     | 0.58 |      |         |    |    |    |     |       |     |            |      |      |    |     |       |       |            |       |       |    |      |      |       |
| 38 - 96    |               |    |    | 0.64 |     |      |      |                     |    |    | 0.64 |     |      |      |         |    |    |    |     |       |     |            |      |      |    |     |       |       |            |       |       |    |      |      |       |
| 45 - 113   |               |    |    | 0.53 |     |      |      |                     |    |    | 0.53 |     |      |      |         |    |    |    |     |       |     |            |      |      |    |     |       |       |            |       |       |    |      |      |       |
| 57 - 115   |               |    |    | 0.50 |     |      |      |                     |    |    | 0.50 |     |      |      |         |    |    |    |     |       |     |            |      |      |    |     |       |       |            |       |       |    |      |      |       |
| 59 - 120   |               |    |    | 0.54 |     |      |      |                     |    |    | 0.54 |     |      |      |         |    |    |    |     |       |     |            |      |      |    |     |       |       |            |       |       |    |      |      |       |
| 61 - 122   |               |    |    | 0.52 |     |      |      |                     |    |    | 0.52 |     |      |      |         |    |    |    |     |       |     |            |      |      |    |     |       |       |            |       |       |    |      |      |       |
| 64 - 129   |               |    |    |      |     |      |      |                     |    |    |      |     |      |      |         |    |    |    |     |       |     |            |      |      |    |     |       |       |            |       |       |    |      |      |       |
| 66 - 131   |               |    |    |      |     |      |      |                     |    |    |      |     |      |      |         |    |    |    |     |       |     |            |      |      |    |     |       |       |            |       |       |    |      |      |       |
| 68 - 134   |               |    |    | 0.47 |     |      |      |                     |    |    |      |     |      |      |         |    |    |    |     |       |     |            |      |      |    |     |       |       | -0.53      | -0.56 |       |    |      |      |       |
| 71 - 136   |               |    |    |      |     |      | 0.47 |                     |    |    |      |     |      |      |         |    |    |    |     |       |     |            | 0.50 |      |    |     |       |       | -0.55      | -0.65 | -0.57 |    |      |      |       |
| 74 - 138   |               |    |    |      |     |      | 0.59 |                     |    |    |      |     |      | 0.52 |         |    |    |    |     |       |     | 0.52       | 0.58 | 0.50 |    |     |       |       | -0.53      | -0.61 | -0.62 |    |      |      | -0.61 |
| 79 - 143   |               |    |    |      |     |      | 0.49 |                     |    |    |      |     |      |      |         |    |    |    |     |       |     | 0.57       | 0.63 |      |    |     |       |       |            | -0.54 | -0.51 |    |      |      |       |
| 80 - 145   |               |    |    |      |     |      |      |                     |    |    |      |     |      |      |         |    |    |    |     |       |     | 0.63       | 0.68 |      |    |     |       | -0.56 | -0.56      | -0.55 |       |    | 0.53 |      |       |
| 81 - 152   |               |    |    |      |     |      |      |                     |    |    |      |     |      |      |         |    |    |    |     |       |     | 0.62       | 0.69 |      |    |     |       |       | -0.51      | -0.51 | -0.67 |    |      |      | -0.50 |

[illegible]

[illegible]

[illegible]

[illegible]
